# Supplementary material for: Improving predictive models for Alzheimer’s disease using GWAS data by incorporating misclassified samples modeling
Source: PLoS One. 2020 Apr 23;15(4):e0232103. doi: 10.1371/journal.pone.0232103 (PMC7179850; doi:10.1371/journal.pone.0232103)
Supplement: S7 Table — (CSV) [file pone.0232103.s008.csv]

chr	pos	snp	gene_name	Gene_ID	start	end	strand
1	4496659	rs1674877
1	4756276	rs7518469	AJAP1	55966	4715105	4843851	+
1	6141325	rs3789541	KCNAB2	8514	6052358	6161253	+
1	10236039	rs6541080	UBE4B	10277	10093041	10241297	+
1	18086999	rs7534822	ACTL8	81569	18081808	18153558	+
1	18105498	rs11577496	ACTL8	81569	18081808	18153558	+
1	18914423	rs2816065
1	22648411	rs6690148	LOC101060363	101060363	22649321	22649824	-
1	38774882	rs1778037
1	63775056	rs2367270	LINC00466	199899	63624754	63782901	-
1	63914117	rs3009577	ITGB3BP	23421	63906441	63988944	-
1	67697271	rs12070470	IL23R	149233	67604590	67725662	+
1	68010127	rs10493425
1	78649862	rs4650571
1	84915300	rs6677436
1	85280161	rs2025689	LPAR3	23566	85279086	85358896	-
1	91735313	rs281968	HFM1	164045	91726323	91870426	-
1	92087522	rs4658104
1	95835124	rs7531902
1	112788376	rs2027278
1	115609203	rs1321106	TSPAN2	10100	115590632	115632121	-
1	116239368	rs10494179	VANGL1	81839	116184574	116240845	+
1	116391331	rs10923633
1	168589182	rs2419117
1	173278365	rs6677245	LOC100506023	100506023	173204199	173446294	-
1	190070919	rs17375108	BRINP3	339479	190066792	190447534	-
1	204592174	rs12094388	LRRN2	10446	204586298	204654597	-
1	205813672	rs11240574	PM20D1	148811	205797150	205819276	-
1	233738271	rs1693230
1	237445099	rs12046077	RYR2	6262	237205510	237997288	+
1	240177781	rs922305	RPS7P5	645884	240170824	240176560	+
1	240183949	rs2066298
2	515593	rs2724929
2	2718978	rs6548077
2	9376835	rs11692473	ASAP2	8853	9346894	9545812	+
2	12970155	rs7559029
2	16796470	rs751192	FAM49A	81553	16730727	16847134	-
2	40400179	rs105287	SLC8A1	6546	40339286	40739575	-
2	40538968	rs2110743	SLC8A1	6546	40339286	40739575	-
2	48167631	rs4552231	LOC101928610	101928610	48166873	48167384	-
2	48461993	rs3750272
2	53882527	rs2160930
2	54917250	rs354230
2	59290759	rs10490103	LINC01122	400955	58747888	59290901	+
2	66698796	rs10203407	MEIS1	4211	66662257	66799891	+
2	71572455	rs7581030	ZNF638	27332	71503729	71662191	+
2	77595904	rs192634	LRRTM4	80059	76974849	77749502	-
2	87058580	rs4832054	CD8B	926	87042460	87089047	-
2	106742778	rs17213510	UXS1	80146	106709759	106810795	-
2	106887870	rs7419384
2	121812899	rs775800
2	123741357	rs1507670
2	124697000	rs1214118
2	138545443	rs10928631
2	146644471	rs12616481
2	150742467	rs7588167
2	152990721	rs3768651	STAM2	10254	152973315	153032506	-
2	153393947	rs2577180	FMNL2	114793	153191684	153506348	+
2	173719520	rs2676510	RAPGEF4	11069	173600525	173917621	+
2	191902758	rs3821236	STAT4	6775	191894302	192037404	-
2	213253930	rs13383860	ERBB4	2066	212240442	213403879	-
2	214006439	rs16849846	IKZF2	22807	213864408	214016379	-
2	214099810	rs1372140
2	216866439	rs3770560	MREG	55686	216807314	216878346	-
3	2936639	rs17646659	CNTN4	152330	2140550	3099645	+
3	8881649	rs124844
3	20042834	rs4103004	PP2D1	151649	20021453	20053765	-
3	28745139	rs6549877	LINC00693	645206	28616769	28799828	+
3	31919601	rs13091847	OSBPL10	114884	31702317	32023342	-
3	36695746	rs7625222
3	37858410	rs6780036	LOC101928153	101928153	37850352	37892932	-
3	39056526	rs6796391
3	67072952	rs4074707
3	69059023	rs9812253	EOGT	285203	69024363	69063112	-
3	73157288	rs6766673
3	73898514	rs4677353
3	81854425	rs2315966
3	111532971	rs6809414	PHLDB2	90102	111451327	111695364	+
3	119345950	rs657079	PLA1A	51365	119316695	119348658	+
3	143481878	rs7613141	SLC9A9	285195	142984063	143567373	-
3	143576347	rs4839614	RPS17P10	100271071	143574531	143575007	-
3	154920664	rs17386464
3	177114488	rs7374825
3	177119143	rs6804202
3	178952507	rs9838117	PIK3CA	5290	178866311	178952500	+
3	184502446	rs17220361
3	186684511	rs16861384	ST6GAL1	6480	186648315	186796341	+
4	5424741	rs195098	STK32B	55351	5053527	5502728	+
4	6293350	rs10012946	WFS1	7466	6271577	6304992	+
4	10871655	rs10516213
4	10886524	rs16874378
4	31476327	rs746977
4	40704872	rs10000266
4	63288507	rs1830310
4	80606743	rs6842379
4	80634958	rs9991949
4	88662531	rs2732204
4	101132253	rs12506292	LOC101929353	101929353	101114903	101136662	+
4	103388441	rs230489
4	125465163	rs1567396	LOC101927087	101927087	125421097	125479589	-
4	162307060	rs17040984	FSTL5	56884	162305044	163085186	-
4	169448628	rs9312333	PALLD	23022	169418215	169849608	+
4	179399523	rs2702414
5	9575041	rs218041
5	10149225	rs10513044
5	16850125	rs9312938	MYO10	4651	16662016	16936385	-
5	25926946	rs16895144
5	42949688	rs6870664
5	73399843	rs17555606
5	75300224	rs11750465
5	96363459	rs11746232	LNPEP	4012	96271346	96365115	+
5	120821261	rs11748934
5	145297971	rs970456	GRXCR2	643226	145239204	145299816	-
5	155819278	rs6862189	SGCD	6444	155462147	156194799	+
5	157722057	rs12173156
5	159740138	rs10038395	CCNJL	79616	159678666	159739602	-
5	161855696	rs4382202
5	163647529	rs918507
5	166373903	rs244436
5	169644845	rs1025003
5	174628231	rs1833755
6	3699703	rs226930	LOC100507336	100507336	3688360	3720311	-
6	6680510	rs3761986
6	7302507	rs2764092	SSR1	6745	7281283	7313541	-
6	16565192	rs9477166	ATXN1	6310	16299343	16761721	-
6	20137841	rs4712455	MBOAT1	154141	20099915	20212695	-
6	32698457	rs9276162
6	33857525	rs2274154	LINC01016	100507584	33857288	33864684	-
6	45797856	rs10948259
6	47709696	rs12215131
6	47711600	rs1890061
6	51611470	rs2397060	PKHD1	5314	51480145	51952423	-
6	53075072	rs2816377
6	55734220	rs9475436	BMP5	653	55618451	55740388	-
6	55739553	rs3734444	BMP5	653	55618451	55740388	-
6	79185106	rs600188
6	95103580	rs9445243
6	104852424	rs9404549
6	121696060	rs7741391
6	131857907	rs9493022
6	133748381	rs9385647	EYA4	2070	133561512	133853258	+
6	133934829	rs2677829
6	133946416	rs2636623
6	144297152	rs9386053	PLAGL1	5325	144261437	144385736	-
6	144952491	rs11155364	UTRN	7402	144606434	145174170	+
6	151488316	rs9478967
6	163249645	rs9347691	PACRG	135138	163148164	163736524	+
6	166661518	rs9356457	LOC101929297	101929297	166650457	166670435	+
6	170620572	rs2024694	FAM120B	84498	170615812	170716155	+
6	170783347	rs9460196
7	2649673	rs3735108	IQCE	23288	2598617	2654368	+
7	2649704	rs3735109	IQCE	23288	2598617	2654368	+
7	26614241	rs4722614
7	30667433	rs2709778	GARS	2617	30634181	30673649	+
7	38329818	rs12154478	TRGV11	6985	38331217	38331679	-
7	62641533	rs1806453
7	70209637	rs723340	AUTS2	26053	69063905	70257885	+
7	87835469	rs1063964	SRI	6717	87834430	87856308	-
7	95630601	rs4727332	DYNC1I1	1780	95401818	95739634	+
7	101109073	rs10276579	COL26A1	136227	101006101	101202304	+
7	114338815	rs7795485
7	130985792	rs7781339	MKLN1	4289	130794855	131181398	+
7	132037683	rs12539196	PLXNA4	91584	131808091	132333447	-
7	146920089	rs7806237	CNTNAP2	26047	145813453	148118090	+
7	150956627	rs219236	SMARCD3	6604	150936059	150974231	-
7	152845911	rs715851
7	153387672	rs6961482
8	430397	rs9644361
8	1890533	rs7386016	ARHGEF10	9639	1772149	1906807	+
8	8996273	rs330911	PPP1R3B	79660	8993764	9009152	-
8	15565126	rs10104063	TUSC3	7991	15397596	15624158	+
8	15644927	rs352768
8	15906277	rs12544662
8	41204995	rs12549180
8	43327870	rs10104107
8	43539041	rs6474486
8	59602802	rs12682103
8	64247381	rs7015856
8	71352113	rs16937025
8	74142151	rs12544429
8	76338381	rs17303296
8	79819540	rs1972436
8	98358246	rs7832008	LOC101927066	101927066	97964092	98458725	-
8	109291233	rs1975804
8	111438655	rs7008113
8	138236515	rs16906883
8	144520668	rs13267988	ZC3H3	23144	144519825	144624449	-
8	146292734	rs6991681
9	5464065	rs10125854	CD274	29126	5450503	5470567	+
9	7906830	rs10815710
9	25775262	rs10967072
9	27200738	rs4242670	TEK	7010	27109147	27230172	+
9	72527688	rs17520192
9	84399614	rs676113
9	114608946	rs10981116
9	121988899	rs10818288	BRINP1	1620	121928907	122131739	-
9	125289521	rs10818708	OR1N1	138883	125288637	125289572	-
9	134696326	rs716738
9	136906752	rs3847320	BRD3	8019	136895427	136933655	-
10	3205745	rs7070745	PITRM1	10531	3179919	3215033	-
10	3590269	rs1890583
10	4151051	rs4881291
10	4219333	rs4275521
10	11000339	rs62209	CELF2	10659	10838851	11378674	+
10	22323646	rs7898954
10	24334928	rs10828594	KIAA1217	56243	23983675	24836772	+
10	32071859	rs2797142
10	32684126	rs7922515
10	36935586	rs11010758
10	63369632	rs1456285
10	64224100	rs6479815	ZNF365	22891	64133916	64431771	+
10	76505571	rs10824233	FAM32C	645646	76502959	76504560	-
10	81794163	rs2342606	C1DP2	642538	81791366	81792228	-
10	82040346	rs2282367	MAT1A	4143	82031576	82049721	-
10	82041751	rs756208	MAT1A	4143	82031576	82049721	-
10	87890326	rs5003944	GRID1	2894	87359312	88126250	-
10	87896157	rs11816291	GRID1	2894	87359312	88126250	-
10	99342970	rs2282372	HOGA1	112817	99344102	99372559	+
10	116346224	rs2483578	ABLIM1	3983	116190869	116444762	-
10	122564882	rs11199574	WDR11-AS1	283089	122521324	122610691	-
10	124959614	rs11248442
10	128534122	rs12357398
10	129903802	rs11016073	MKI67	4288	129894923	129924468	-
10	129954972	rs12572759
10	130322451	rs10764786
10	133933505	rs4880336	JAKMIP3	282973	133879367	133998482	+
11	2195981	rs10743152	MIR4686	100616126	2194293	2194368	+
11	6311485	rs6578752
11	9636854	rs12273601
11	12909146	rs4757064	TEAD1	7003	12695969	12966284	+
11	18319180	rs7128017	HPS5	11234	18300217	18343751	-
11	18501834	rs2291753	TSG101	7251	18501858	18548503	-
11	44724527	rs12420859
11	56003589	rs10896138
11	56030354	rs7122505
11	59837097	rs528823	MS4A3	932	59824101	59838588	+
11	62043929	rs7925016
11	62227307	rs1783180	AHNAK	79026	62201014	62314332	-
11	86305100	rs7119775	ME3	10873	86152150	86383678	-
11	101323133	rs7931399	TRPC6	7225	101322295	101454687	-
11	101356606	rs7934021	TRPC6	7225	101322295	101454687	-
11	103418084	rs10895458
11	119763417	rs523223
11	129167003	rs4261298	ZNF123P	100188891	129165098	129166510	-
11	129234409	rs7924909
12	5842891	rs16933825	ANO2	57101	5671817	6055398	-
12	51530796	rs6580792	TFCP2	7024	51487539	51566926	-
12	52841765	rs388626	KRT6B	3854	52840435	52845910	-
12	66575118	rs1436849
12	68825942	rs2287476	LOC101927981	101927981	68825622	68845449	-
12	71849276	rs10748176	LGR5	8549	71832931	71980090	+
12	95198736	rs17023308
12	99244826	rs201363	ANKS1B	56899	99128569	100378512	-
12	129113745	rs7136901	TMEM132C	92293	128751948	129192460	+
13	23827815	rs7995077	SGCG	6445	23755060	23899304	+
13	36473301	rs11841466	DCLK1	9201	36342789	36705514	-
13	43574986	rs4142312
13	44667582	rs9533767
13	47457693	rs17288723	HTR2A	3356	47405677	47471211	-
13	48392133	rs17070878
13	61977349	rs9539155
13	72988938	rs1924960
13	84559815	rs4255684
13	107105869	rs7335730
14	21275334	rs743249
14	25434139	rs8021478	STXBP6	29091	25278860	25519095	-
14	25622059	rs1241513
14	33835920	rs10483438	NPAS3	64067	33404115	34273382	+
14	34186611	rs9285571	NPAS3	64067	33404115	34273382	+
14	34469881	rs900360
14	57037260	rs10138354
14	57563519	rs4901761
14	83306196	rs6574721
14	92156661	rs11160024	CATSPERB	79820	92046728	92198413	-
14	94237254	rs2145472	PRIMA1	145270	94184644	94254766	-
14	96732121	rs11622299	BDKRB1	623	96721641	96735304	+
14	99182771	rs1543422	C14ORF177	283598	99177950	99184103	+
15	23042155	rs12439636	NIPA1	123606	23043279	23086843	-
15	26037199	rs8035375	ATP10A	57194	25923859	26110304	-
15	40704394	rs12440317	IVD	3712	40697686	40728146	+
15	45095196	rs10152725
15	47999160	rs1224657	SEMA6D	80031	47476403	48066420	+
15	53358458	rs335489
15	58672997	rs371125
15	62082829	rs4293320
15	76413529	rs2959823	C15ORF27	123591	76352299	76497304	+
15	78986805	rs8041377
15	79184387	rs9806693	MORF4L1	10933	79132903	79190081	+
15	93177599	rs3803523	FAM174B	400451	93160678	93199031	-
15	95118265	rs2161936
15	101089573	rs12915921	PRKXP1	441733	101087957	101099488	-
15	101670586	rs1902131
16	381141	rs12719801	AXIN1	8312	337440	405244	-
16	1560111	rs9454	IFT140	9742	1560428	1662109	-
16	5928256	rs3859167	RBFOX1	54715	5289469	7763342	+
16	7638949	rs11647105	RBFOX1	54715	5289469	7763342	+
16	10659886	rs4780947	EMP2	2013	10622279	10674539	-
16	12709531	rs7188223
16	17384524	rs11861415	XYLT1	64131	17196181	17564738	-
16	20141365	rs4238574
16	48234327	rs16945930	ABCC11	85320	48200782	48281479	-
16	57670947	rs1466134	GPR56	9289	57653442	57698944	+
16	58160974	rs10445014	C16ORF80	29105	58147496	58163296	-
16	59591925	rs1482246
16	60598610	rs9746438
16	75223491	rs10871304
16	82489484	rs4783035
16	87194194	rs11117255
17	12580010	rs12150632	LOC101928418	101928418	12575179	12609451	-
17	13691052	rs1530361	LOC100506974	100506974	13679945	13695867	-
17	14742261	rs7207432
17	39664087	rs4796606
17	59352163	rs8082635	BCAS3	54828	58755172	59470199	+
17	59366049	rs7215706	BCAS3	54828	58755172	59470199	+
17	60802483	rs17683483	MARCH10	162333	60778675	60885705	-
17	64971249	rs740559	CACNG4	27092	64960980	65029518	+
17	69916524	rs16977009
17	74912360	rs4789374	MGAT5B	146664	74864798	74946472	+
18	6384431	rs1436907	L3MBTL4	91133	5954705	6414910	-
18	8656528	rs755776
18	9412451	rs8094970
18	27368785	rs9951431
18	35984429	rs1196581
18	53273614	rs635538	TCF4	6925	52889562	53303252	-
18	53415377	rs4800995
18	55787050	rs4940643	NEDD4L	23327	55711580	56068772	+
18	60754772	rs9945969
18	62639031	rs9947925	LOC101927404	101927404	62603417	62660057	-
18	71385891	rs10514087
18	72190789	rs17089368	CNDP2	55748	72163500	72190689	+
18	72784717	rs9964228
18	73533188	rs12456174
18	76510886	rs12456720
19	45361224	rs440277	PVRL2	5819	45349393	45392485	+
19	45382034	rs6859	PVRL2	5819	45349393	45392485	+
19	45395266	rs157580	TOMM40	10452	45394477	45406946	+
19	45395619	rs2075650	TOMM40	10452	45394477	45406946	+
19	45401666	rs8106922	TOMM40	10452	45394477	45406946	+
19	45414451	rs439401	APOE	348	45409039	45412650	+
19	45729275	rs346763	EXOC3L2	90332	45715879	45737469	-
20	4335298	rs159764
20	4352277	rs3843781
20	7496565	rs6086075
20	12944539	rs433279
20	13270765	rs6078976	ISM1	140862	13202418	13281297	+
20	44333052	rs980984	MIR3617	100500897	44333741	44333819	-
20	44448292	rs6130940
20	51992764	rs156617	TSHZ2	128553	51588946	52111869	+
20	52762418	rs2762926
20	53538816	rs6014216
21	15634304	rs372992
21	15898864	rs2822740	SAMSN1	64092	15857549	15955723	-
21	32390078	rs16987537
21	46124056	rs2250930	KRTAP10-13P	100874224	46121949	46122716	+
22	26139378	rs5761163	MYO18B	84700	26138117	26453345	+
22	29567431	rs132323
22	32446805	rs17745316	SLC5A1	6523	32439019	32509016	+
22	38121152	rs9610841	TRIOBP	11078	38092995	38172563	+
